# Supplementary material for: In Vivo Irradiation of Mice Induces Activation of Dendritic Cells
Source: PubMed Central journal article supplement (PMC6121955; doi:10.3390/ijms19082391), 2018-08-14
Supplement: ijms-19-02391-s001.pdf [file ijms-19-02391-s001.pdf]

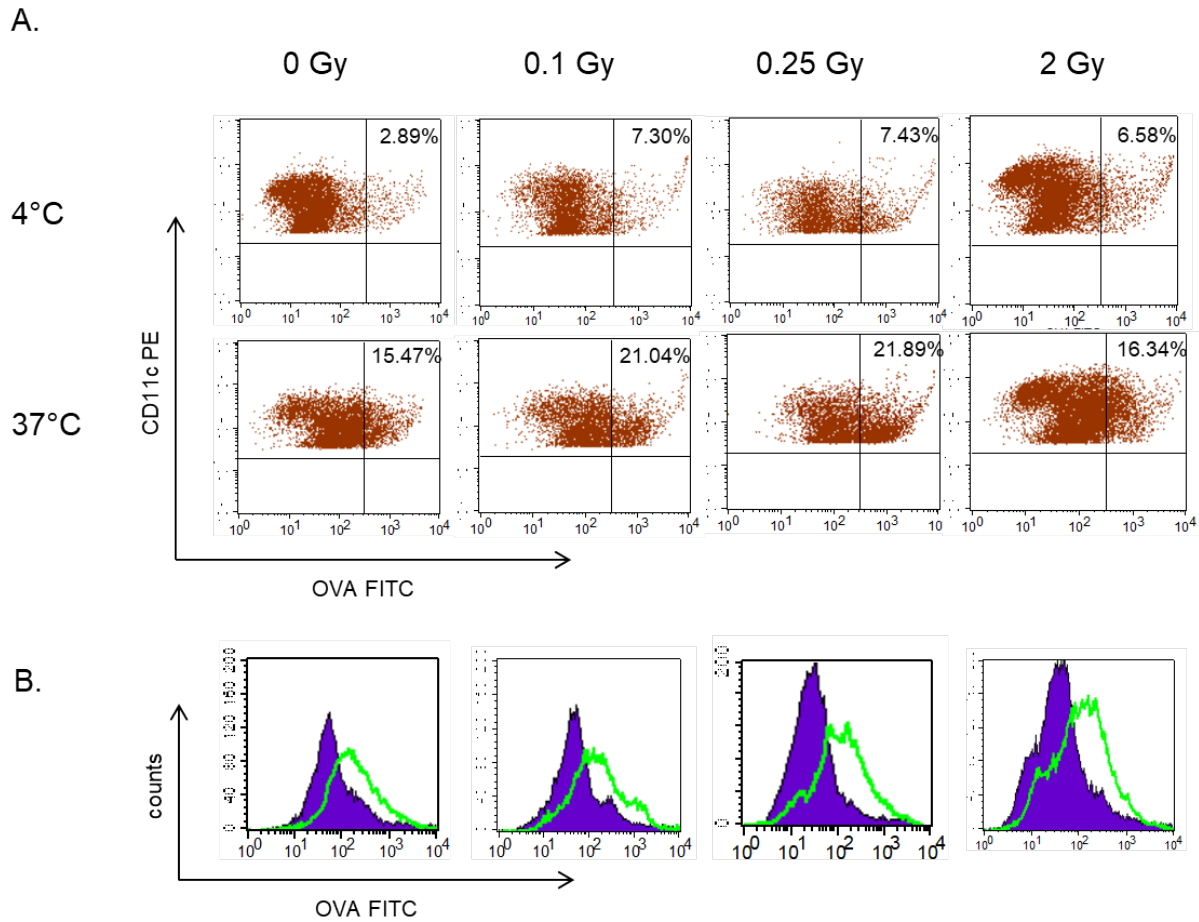

**Supplementary figure 1.** Ovalbumine (OVA) peptide uptake by CD11c+MHCII+ DCs. **A.** Isolated dendritic cells (DCs) were incubated with FITC-labeled OVA peptide at 4°C and at 37°C simultaneously, as described in Materials and Methods. The percentage of OVA peptide uptake by CD11c+MHCII+ DCs was calculated by subtracting values of unspecific uptake observed at 4°C. **B.** Histogram plots of DC fluorescence after FITC-labeled OVA peptide uptake expressed as mean fluorescent intensities (MFI) in control samples (left histogram) and samples irradiated with 2 Gy (right histogram). Differences between samples incubated in 4°C (purple areas) and 37°C (green lines) are shown.

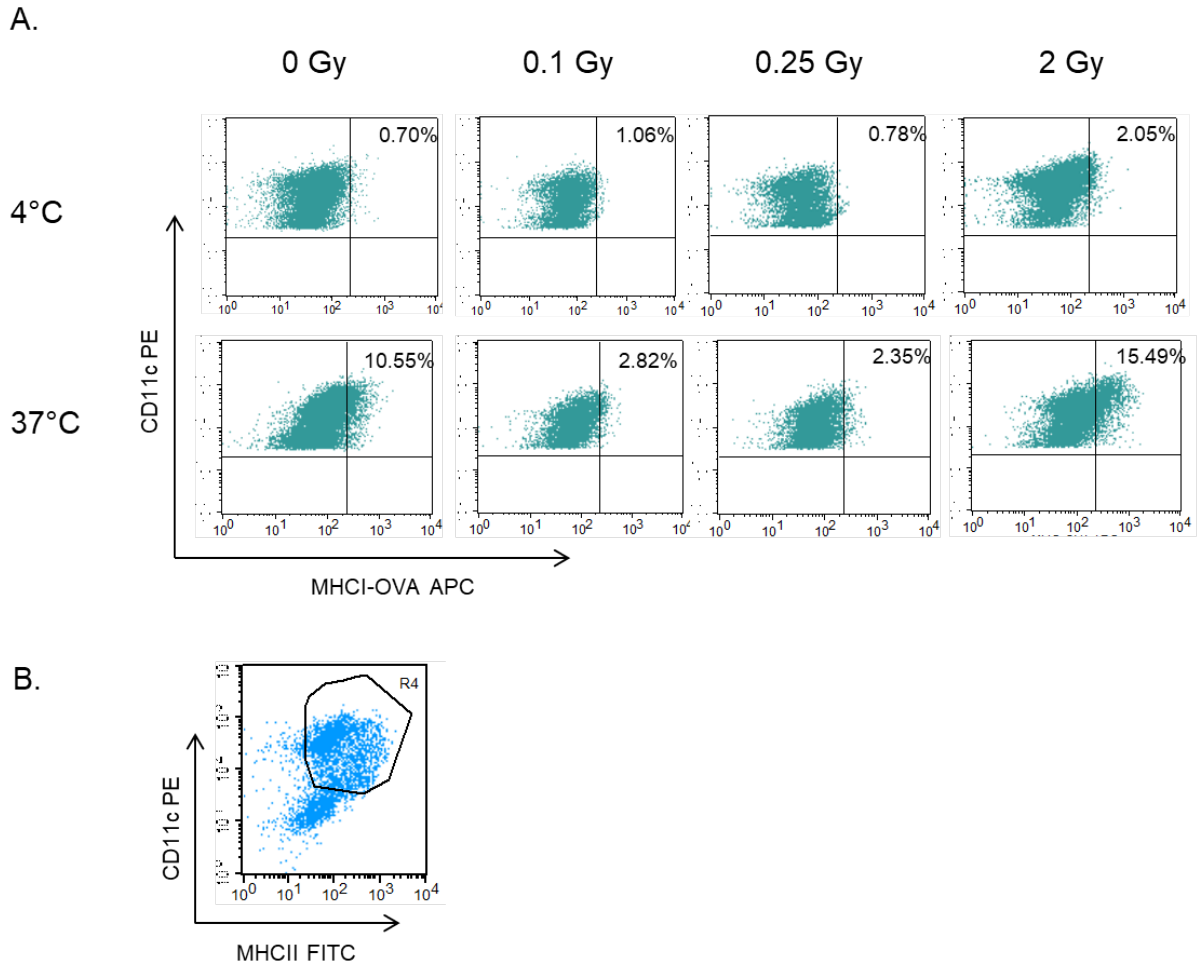

**Supplementary figure 2.** OVA peptide presentation on major histocompatibility complex (MHC) molecules by CD11c<sup>+</sup>MHCII<sup>+</sup> DCs. Isolated DCs were incubated in the presence of unlabeled SIINFEKL peptide. Cells were labeled with H2b-SIINFEKL-FITC antibody able to detect MHCII-bound SIINFEKL peptide. **A.** The percentage of OVA peptide presentation by DCs was calculated by subtracting values of unspecific binding observed at 4°C. **B.** Gating strategy shown for CD11c<sup>+</sup>MHCII<sup>+</sup> cells.

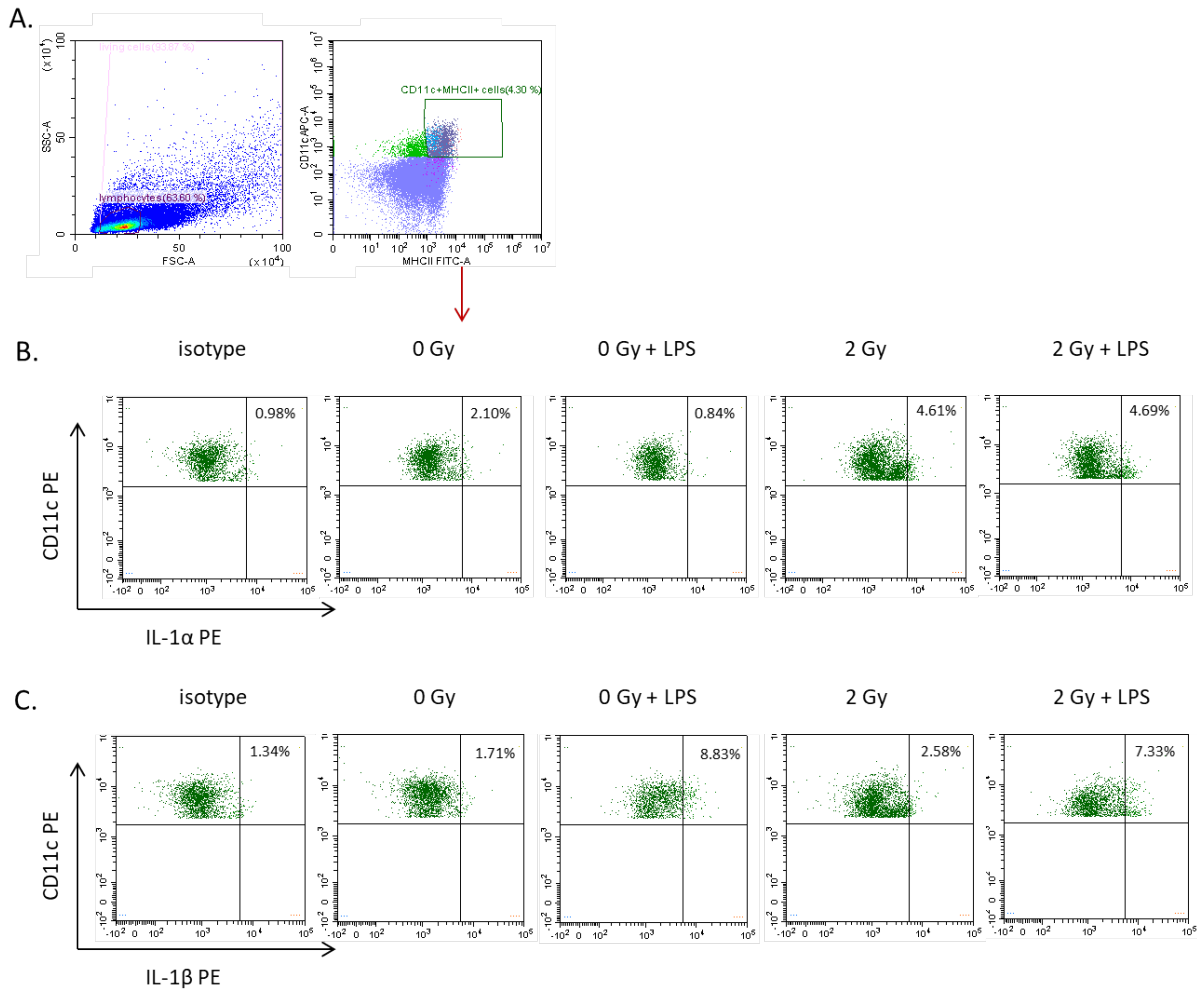

**Supplementary figure 3. A.** Gating strategy of CD11c+MHCII+ cells within splenocytes with lymphocyte population being excluded. Dot plots of **(B.)** IL1 $\alpha$  and **(C.)** IL1 $\beta$  levels. The plot shows the percentage of cytokine expression of control (0 Gy) and irradiated (2 Gy) and/or lipopolysaccharide (LPS)-stimulated CD11c+MHCII+ DCs. Mice were total-body irradiated, treated with intraperitoneal (i.p.) LPS injection 18 hours later, followed by i.p. Brefeldin A injection. Cytokine production was determined 6 hours after LPS treatment in the CD11c+MHCII+ splenic DCs by intracellular cytokine labelling as described in Materials and Methods. Data represent one typical experiment.

**Supplementary table 1.** Treg and Teff cells' proliferation measured in counts per minute (cpm). Either isolated Tregs or Teffs were cultured with DCs isolated from sham-irradiated or irradiated mice as described in Materials and Methods. T cell proliferation was measured by 3H-thymidine incorporation using a liquid-scintillation counter and expressed in cpm.

| Counts per minute (CPM) |          | 0 Gy DC        |                | 2 Gy DC       |                |
|-------------------------|----------|----------------|----------------|---------------|----------------|
|                         |          | Teff           | Treg           | Teff          | Treg           |
| experiment 1            | sample 1 | 985            | 1738           | 2260          | 846            |
|                         | sample 2 | 1458           | 3578           | 2925          | 2505           |
|                         | sample 3 | 1921           | 3578           |               | 2855           |
| experiment 2            | sample 1 | 4382           | 5060           | 4593          | 3706           |
|                         | sample 2 | 5481           | 6873           | 4549          | 4256           |
|                         | sample 3 | 6518           | 6431           | 7122          | 3830           |
|                         | sample 4 | 5921           | 6023           | 5179          | 2324           |
| experiment 3            | sample 1 | 1880           | 2253           | 1791          | 2518           |
|                         | sample 2 | 1651           | 2413           | 2676          | 2421           |
|                         | sample 3 | 2432           | 3305           | 2459          | 2154           |
|                         | sample 4 | 1888           | 2652           | 1693          | 1573           |
| Average                 |          | <b>3037.91</b> | <b>3991.27</b> | <b>3524.7</b> | <b>2635.27</b> |
| Standard deviation      |          | 2024.85        | 1808.94        | 1765.21       | 999.20         |

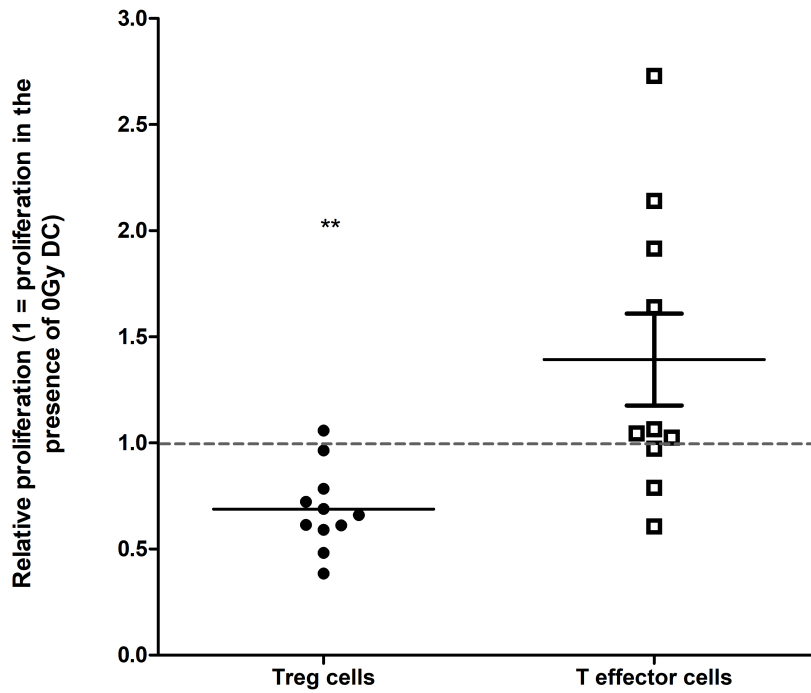

**Supplementary figure 4.** Relative proliferation of Tregs and Teffs after coculture with 2 Gy DCs. Isolated Treg and Teff cells were incubated with 0 Gy and 2 Gy DCs. Proliferation was measured 5 days later by  $^3\text{H}$ -thymidine incorporation as described in Materials and Methods. Data represent the average of three independent experiments, with bars indicating mean  $\pm$  SD. Significance was tested by Student's t-test with \*\* $p < 0.001$ .

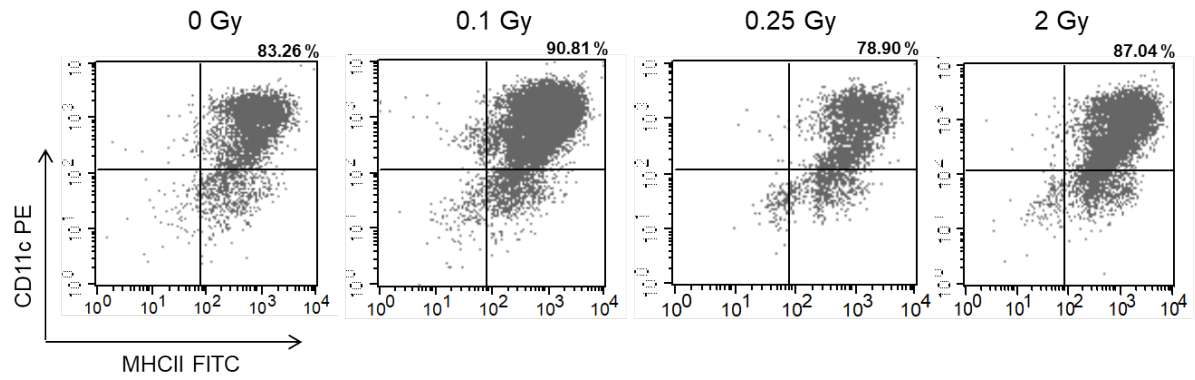

**Supplementary figure 5.** Dot plots showing the purity of DC-cell population. CD11c<sup>+</sup> cells were purified by magnetic cell sorting using the Miltenyi Biotec's CD11c<sup>+</sup> Dendritic Cell Isolation Kit, as described in Materials and Methods. Isolated CD11c<sup>+</sup> cells were labelled with CD11c-PE and MHCII-FITC antibody. Data are from one representative experiment.

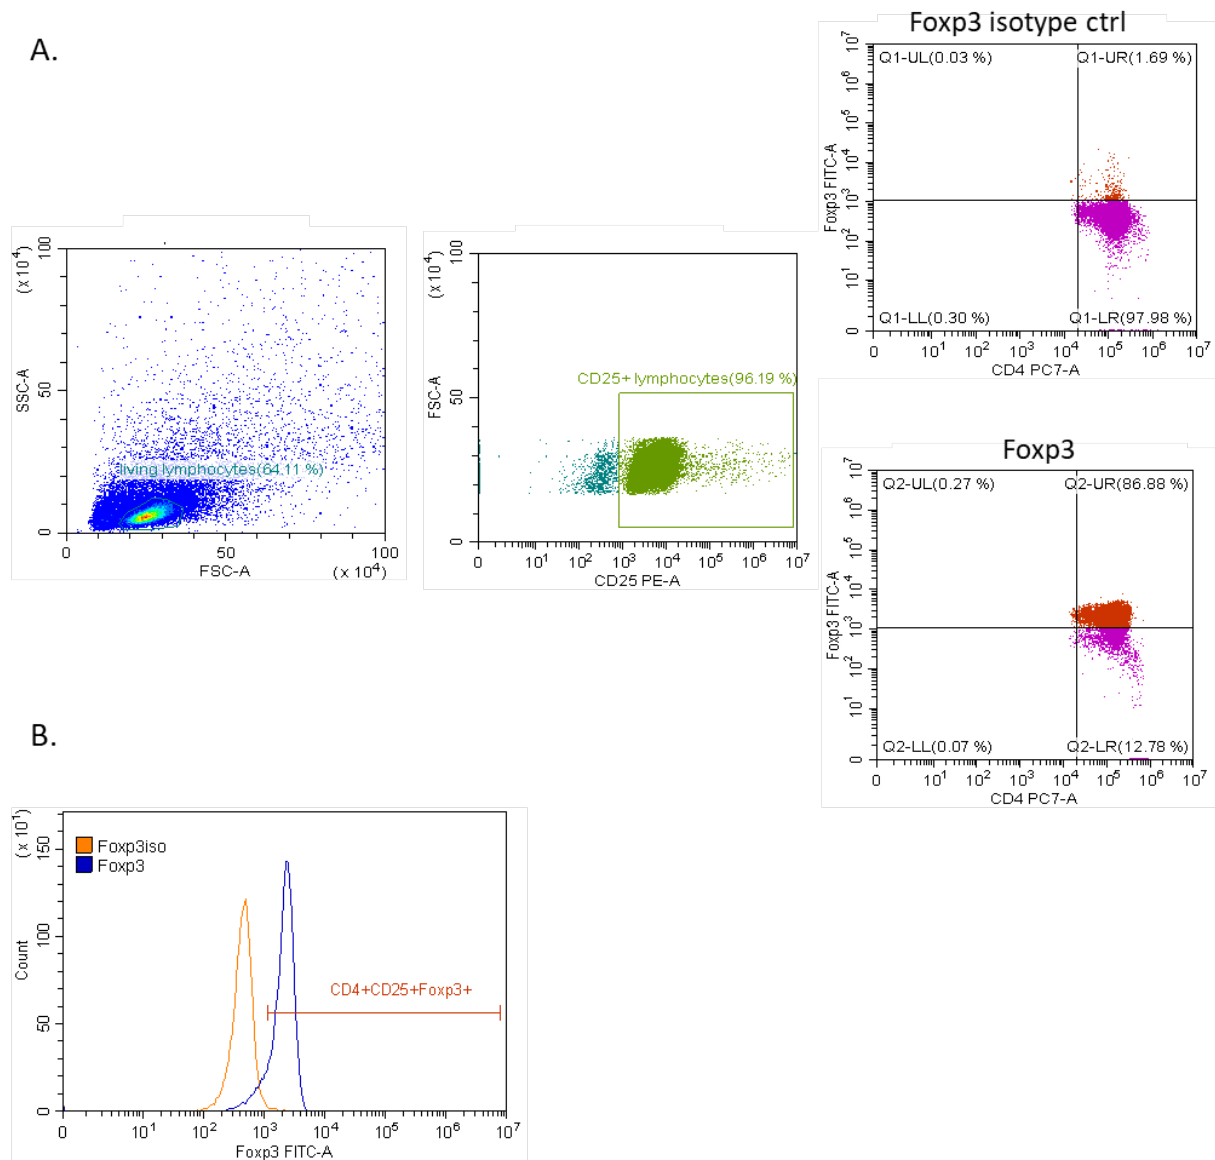

**Supplementary figure 6. (A.)** Dot plot and **(B.)** histogram data showing the purity of isolated Treg cells. CD4+CD25+ Tregs were purified by magnetic cell sorting using the Miltenyi Biotec's CD4+CD25+ Regulatory T Cell Isolation Kit, as described in Materials and Methods. Isolated CD4+CD25+ cells were fixed, permeabilized, and labeled intracellularly with a Foxp3-FITC antibody. Percentage of Foxp3+ cells within CD4+CD25+ cell population represents purity of isolated Treg cells. Data are from one typical experiment.
